# Supplementary material for: Oxidative Quality of Acid Oils and Fatty Acid Distillates Used in Animal Feeding
Source: MDPI journal article supplement (doi:10.3390/ani11092559), 2021-08-31
Supplement: s1 [file animals-1326190-supplementary.pdf › animals-1326190-supplementary.pdf]

## SUPPLEMENTARY MATERIAL

**Table S1.** Median values for the individual fatty acids identified and quantified by internal normalization (peak area percentage) according to the type of by-product and the botanical origin.

| By-product                                        | Botanical origin | C6:0               | C8:0               | C10:0              | C12:0              | C14:0              | C16:0               | C16:1 n-9          | C16:1 n-7         | C17:0              | C18:0              | C18:1 <i>trans</i>  | C18:1 n-9           | C18:1 n-7          | C18:2 n-6          | C20:0              | C18:3 n-3          | C20:1 n-9          | C20:2 n-6          | C22:0              | C22:2 | C24:0              |
|---------------------------------------------------|------------------|--------------------|--------------------|--------------------|--------------------|--------------------|---------------------|--------------------|-------------------|--------------------|--------------------|---------------------|---------------------|--------------------|--------------------|--------------------|--------------------|--------------------|--------------------|--------------------|-------|--------------------|
| Acid oils<br>(AO, <i>n</i> = 79)                  | SCP              | 0.00 <sup>a</sup>  | 0.01 <sup>a</sup>  | 0.01 <sup>a</sup>  | 0.02 <sup>bc</sup> | 0.15 <sup>c</sup>  | 21.86 <sup>d</sup>  | 0.05 <sup>b</sup>  | 0.35 <sup>b</sup> | 0.20 <sup>c</sup>  | 23.38 <sup>c</sup> | 0.48 <sup>ab</sup>  | 37.26 <sup>c</sup>  | 0.96 <sup>a</sup>  | 12.67 <sup>b</sup> | 0.98 <sup>c</sup>  | 0.90 <sup>a</sup>  | 0.18 <sup>a</sup>  | 0.00 <sup>ab</sup> | 0.41 <sup>a</sup>  | 0.00  | 0.29 <sup>a</sup>  |
|                                                   | SP               | 0.02 <sup>b</sup>  | 0.09 <sup>c</sup>  | 0.04 <sup>c</sup>  | 0.25 <sup>d</sup>  | 0.38 <sup>c</sup>  | 18.25 <sup>c</sup>  | 0.05 <sup>ab</sup> | 0.17 <sup>a</sup> | 0.10 <sup>ab</sup> | 5.34 <sup>ab</sup> | 0.31 <sup>ab</sup>  | 43.94 <sup>c</sup>  | 1.24 <sup>b</sup>  | 24.87 <sup>c</sup> | 0.45 <sup>a</sup>  | 1.77 <sup>b</sup>  | 0.28 <sup>b</sup>  | 0.00 <sup>a</sup>  | 0.47 <sup>b</sup>  | 0.00  | 0.31 <sup>ab</sup> |
|                                                   | O                | 0.01 <sup>b</sup>  | 0.02 <sup>bc</sup> | 0.01 <sup>b</sup>  | 0.01 <sup>a</sup>  | 0.06 <sup>a</sup>  | 13.20 <sup>b</sup>  | 0.13 <sup>c</sup>  | 0.75 <sup>c</sup> | 0.11 <sup>b</sup>  | 3.63 <sup>a</sup>  | 1.66 <sup>c</sup>   | 64.14 <sup>d</sup>  | 1.95 <sup>c</sup>  | 10.83 <sup>a</sup> | 0.56 <sup>a</sup>  | 1.05 <sup>ab</sup> | 0.32 <sup>c</sup>  | 0.09 <sup>b</sup>  | 0.40 <sup>a</sup>  | 0.00  | 0.55 <sup>c</sup>  |
|                                                   | BS               | 0.00 <sup>ab</sup> | 0.03 <sup>bc</sup> | 0.02 <sup>bc</sup> | 0.02 <sup>d</sup>  | 0.10 <sup>b</sup>  | 13.06 <sup>ab</sup> | 0.06 <sup>b</sup>  | 0.16 <sup>a</sup> | 0.09 <sup>a</sup>  | 3.41 <sup>ab</sup> | 0.66 <sup>abc</sup> | 33.24 <sup>bc</sup> | 1.04 <sup>ab</sup> | 45.81 <sup>d</sup> | 0.54 <sup>a</sup>  | 0.90 <sup>ab</sup> | 0.24 <sup>b</sup>  | 0.00 <sup>ab</sup> | 0.66 <sup>bc</sup> | 0.00  | 0.42 <sup>bc</sup> |
|                                                   | SU               | 0.07 <sup>b</sup>  | 0.03 <sup>c</sup>  | 0.02 <sup>c</sup>  | 0.03 <sup>cd</sup> | 0.12 <sup>b</sup>  | 9.81 <sup>a</sup>   | 0.07 <sup>b</sup>  | 0.19 <sup>a</sup> | 0.09 <sup>a</sup>  | 3.87 <sup>ab</sup> | 1.01 <sup>bc</sup>  | 31.66 <sup>b</sup>  | 1.20 <sup>b</sup>  | 46.14 <sup>d</sup> | 0.79 <sup>b</sup>  | 1.26 <sup>b</sup>  | 0.25 <sup>b</sup>  | 0.00 <sup>ab</sup> | 0.93 <sup>d</sup>  | 0.00  | 0.50 <sup>c</sup>  |
|                                                   | SU-SO            | 0.00 <sup>ab</sup> | 0.02 <sup>bc</sup> | 0.01 <sup>ab</sup> | 0.01 <sup>ab</sup> | 0.11 <sup>b</sup>  | 11.44 <sup>a</sup>  | 0.03 <sup>a</sup>  | 0.12 <sup>a</sup> | 0.10 <sup>ab</sup> | 4.07 <sup>b</sup>  | 0.44 <sup>a</sup>   | 22.36 <sup>a</sup>  | 1.14 <sup>b</sup>  | 52.70 <sup>e</sup> | 0.54 <sup>a</sup>  | 1.99 <sup>b</sup>  | 0.19 <sup>a</sup>  | 0.00 <sup>a</sup>  | 0.80 <sup>cd</sup> | 0.00  | 0.44 <sup>bc</sup> |
|                                                   | SO               | 0.00 <sup>ab</sup> | 0.01 <sup>ab</sup> | 0.01 <sup>ab</sup> | 0.01 <sup>a</sup>  | 0.10 <sup>b</sup>  | 11.51 <sup>ab</sup> | 0.03 <sup>a</sup>  | 0.11 <sup>a</sup> | 0.09 <sup>ab</sup> | 4.09 <sup>ab</sup> | 0.55 <sup>ab</sup>  | 25.17 <sup>a</sup>  | 1.24 <sup>ab</sup> | 51.79 <sup>e</sup> | 0.68 <sup>ab</sup> | 2.83 <sup>b</sup>  | 0.19 <sup>ab</sup> | 0.01 <sup>ab</sup> | 0.93 <sup>cd</sup> | 0.00  | 0.45 <sup>bc</sup> |
| <i>p</i> values <sup>1</sup>                      |                  | 0.010              | 0.000              | 0.000              | 0.000              | 0.000              | 0.000               | 0.000              | 0.000             | 0.000              | 0.000              | 0.001               | 0.000               | 0.000              | 0.000              | 0.000              | 0.021              | 0.000              | 0.006              | 0.000              | 0.108 | 0.000              |
| Fatty acid<br>distillates<br>(FAD, <i>n</i> = 13) | LFAD             | 0.53 <sup>b</sup>  | 6.60 <sup>b</sup>  | 5.55 <sup>c</sup>  | 33.50 <sup>c</sup> | 18.25 <sup>c</sup> | 15.92 <sup>a</sup>  | 0.01 <sup>a</sup>  | 0.06 <sup>a</sup> | 0.03 <sup>a</sup>  | 4.58               | 0.15                | 9.58 <sup>a</sup>   | 0.18 <sup>a</sup>  | 2.52 <sup>a</sup>  | 0.11 <sup>a</sup>  | 0.08 <sup>a</sup>  | 0.05 <sup>a</sup>  | 0.00               | 0.03 <sup>a</sup>  | 0.00  | 0.02 <sup>a</sup>  |
|                                                   | PFAD             | 0.00 <sup>a</sup>  | 0.03 <sup>a</sup>  | 0.02 <sup>b</sup>  | 0.22 <sup>b</sup>  | 1.16 <sup>b</sup>  | 46.31 <sup>b</sup>  | 0.03 <sup>b</sup>  | 0.16 <sup>b</sup> | 0.11 <sup>b</sup>  | 4.53               | 0.21                | 35.98 <sup>b</sup>  | 0.64 <sup>b</sup>  | 8.93 <sup>b</sup>  | 0.34 <sup>b</sup>  | 0.35 <sup>b</sup>  | 0.13 <sup>b</sup>  | 0.01               | 0.06 <sup>a</sup>  | 0.00  | 0.04 <sup>ab</sup> |
|                                                   | OFAD             | 0.00 <sup>a</sup>  | 0.01 <sup>a</sup>  | 0.00 <sup>a</sup>  | 0.01 <sup>a</sup>  | 0.05 <sup>a</sup>  | 11.78 <sup>a</sup>  | 0.14 <sup>c</sup>  | 1.31 <sup>c</sup> | 0.07 <sup>a</sup>  | 1.86               | 0.22                | 69.75 <sup>c</sup>  | 2.83 <sup>c</sup>  | 10.13 <sup>c</sup> | 0.29 <sup>ab</sup> | 0.95 <sup>c</sup>  | 0.29 <sup>c</sup>  | 0.09               | 0.10 <sup>b</sup>  | 0.00  | 0.05 <sup>b</sup>  |
| <i>p</i> values <sup>2</sup>                      |                  | 0.004              | 0.008              | 0.006              | 0.006              | 0.006              | 0.008               | 0.006              | 0.006             | 0.006              | 0.094              | 0.493               | 0.006               | 0.006              | 0.006              | 0.011              | 0.006              | 0.006              | 0.056              | 0.036              | 1.000 | 0.049              |
| AO ( <i>n</i> = 79)                               |                  | 0.00               | 0.02 <sup>a</sup>  | 0.01 <sup>a</sup>  | 0.02 <sup>a</sup>  | 0.11 <sup>a</sup>  | 13.05 <sup>a</sup>  | 0.05 <sup>b</sup>  | 0.30 <sup>b</sup> | 0.10               | 3.88               | 0.66 <sup>b</sup>   | 36.57               | 1.16 <sup>b</sup>  | 36.83 <sup>b</sup> | 0.59 <sup>b</sup>  | 1.05 <sup>b</sup>  | 0.23 <sup>b</sup>  | 0.00               | 0.55 <sup>b</sup>  | 0.00  | 0.45 <sup>b</sup>  |
| FAD ( <i>n</i> = 13)                              |                  | 0.00               | 0.03 <sup>b</sup>  | 0.03 <sup>b</sup>  | 0.29 <sup>b</sup>  | 1.21 <sup>b</sup>  | 18.90 <sup>b</sup>  | 0.03 <sup>a</sup>  | 0.16 <sup>a</sup> | 0.08               | 4.50               | 0.21 <sup>a</sup>   | 35.68               | 0.61 <sup>a</sup>  | 8.49 <sup>a</sup>  | 0.27 <sup>a</sup>  | 0.34 <sup>a</sup>  | 0.12 <sup>a</sup>  | 0.01               | 0.04 <sup>a</sup>  | 0.00  | 0.03 <sup>a</sup>  |
| <i>p</i> values <sup>3</sup>                      |                  | 0.433              | 0.029              | 0.001              | 0.000              | 0.000              | 0.001               | 0.001              | 0.008             | 0.079              | 0.594              | 0.000               | 0.173               | 0.000              | 0.000              | 0.000              | 0.000              | 0.000              | 0.388              | 0.000              | 0.477 | 0.000              |

Abbreviations: SCP, blends of AO from seed oils, cocoa butter and palm oil; SP, blends of AO from seed and palm oils; O, AO from olive pomace oil and blends of AO from olive pomace and olive oils; BS, blends of AO from seed oils; SU, AO from sunflower oil; SU-SO, blends of AO from sunflower and soybean oils; SO, AO from soybean oil; LFAD, FAD from coconut oil and blends of FAD from coconut and palm kernel oils; PFAD, FAD from palm oil; OFAD, FAD from olive pomace and olive oils. <sup>1</sup> *p* values were obtained from Kruskal-Wallis U test. Stepwise Multiple Comparisons for independent samples were used to compare medians between botanical origin groups within acid oils (AO, *n* = 79). AO groups bearing different letters (a-d) were significantly different ( $p \leq 0.05$ ). <sup>2</sup> *p* values were obtained from Kruskal-Wallis U test. Stepwise Multiple Comparisons for independent samples were used to compare medians between botanical origin groups within fatty acid distillates (FAD, *n* = 13). FAD groups bearing different letters (a-c) were significantly different ( $p \leq 0.05$ ). <sup>3</sup> *p* values were obtained from Mann Whitney U test for independent samples to compare medians between AO and FAD (AO, *n* = 79; FAD, *n* = 13). Groups bearing different letters (a-b) were significantly different ( $p \leq 0.05$ ).

**Table S2.** Mean, standard deviation, median, minimum and maximum values for the different sums of fatty acids identified and quantified by peak area normalization (%) according to the botanical origin of the acid oils (AO).

|                              |               | SFA (%)            | <i>trans</i> -C18:1 | <i>cis</i> -MUFA (%) | n-6 PUFA (%)      | n-3 PUFA (%)      | UFA/SFA ratio  |
|------------------------------|---------------|--------------------|---------------------|----------------------|-------------------|-------------------|----------------|
| SCP                          | Mean $\pm$ SD | 46.4 $\pm$ 3.04    | 0.6 $\pm$ 0.32      | 39.2 $\pm$ 1.59      | 12.9 $\pm$ 1.40   | 0.9 $\pm$ 0.16    | 2.7 $\pm$ 1.72 |
|                              | Median        | 47.2 <sup>d</sup>  | 0.5 <sup>ab</sup>   | 38.8 <sup>c</sup>    | 12.7 <sup>b</sup> | 0.9 <sup>a</sup>  | 2.7            |
|                              | Min           | 39.1               | 0.2                 | 37.6                 | 11.2              | 0.6               | 0.9            |
|                              | Max           | 49.1               | 1.4                 | 43.3                 | 15.5              | 1.0               | 4.5            |
| SP                           | Mean $\pm$ SD | 29.8 $\pm$ 6.36    | 0.6 $\pm$ 0.61      | 43.8 $\pm$ 3.27      | 24 $\pm$ 4.79     | 1.9 $\pm$ 1.02    | 2.5 $\pm$ 1.31 |
|                              | Median        | 27.3 <sup>c</sup>  | 0.3 <sup>ab</sup>   | 45.5 <sup>c</sup>    | 24.9 <sup>c</sup> | 1.8 <sup>b</sup>  | 2.4            |
|                              | Min           | 22.8               | 0.1                 | 39.1                 | 18.4              | 0.7               | 1.0            |
|                              | Max           | 39.2               | 1.4                 | 46.7                 | 30.8              | 3.3               | 4.1            |
| O                            | Mean $\pm$ SD | 18.8 $\pm$ 0.66    | 1.6 $\pm$ 0.89      | 67.3 $\pm$ 1.13      | 11.3 $\pm$ 1.00   | 1 $\pm$ 0.09      | 4.3 $\pm$ 1.31 |
|                              | Median        | 18.6 <sup>b</sup>  | 1.7 <sup>c</sup>    | 67.4 <sup>d</sup>    | 10.9 <sup>a</sup> | 1.1 <sup>ab</sup> | 4.7            |
|                              | Min           | 18.1               | 0.3                 | 65.5                 | 10.2              | 0.8               | 0.9            |
|                              | Max           | 20.2               | 2.9                 | 69.5                 | 14.2              | 1.2               | 5.5            |
| BS                           | Mean $\pm$ SD | 17.7 $\pm$ 2.68    | 0.9 $\pm$ 0.54      | 39.3 $\pm$ 10.36     | 41.1 $\pm$ 11.83  | 1 $\pm$ 0.42      | 3.3 $\pm$ 1.88 |
|                              | Median        | 18.2 <sup>ab</sup> | 0.7 <sup>abc</sup>  | 34.9 <sup>bc</sup>   | 45.8 <sup>d</sup> | 0.9 <sup>ab</sup> | 4.1            |
|                              | Min           | 14.2               | 0.2                 | 30.1                 | 18.9              | 0.4               | 1.1            |
|                              | Max           | 22.5               | 1.6                 | 59.5                 | 53.2              | 1.6               | 6.1            |
| SU                           | Mean $\pm$ SD | 17.2 $\pm$ 1.23    | 1.2 $\pm$ 0.98      | 35 $\pm$ 6.98        | 45 $\pm$ 7.12     | 1.6 $\pm$ 1.05    | 3.9 $\pm$ 1.61 |
|                              | Median        | 17.1 <sup>a</sup>  | 1 <sup>bc</sup>     | 33.4 <sup>b</sup>    | 46.2 <sup>d</sup> | 1.3 <sup>b</sup>  | 4.4            |
|                              | Min           | 15.0               | 0.1                 | 26.7                 | 24.7              | 0.4               | 0.2            |
|                              | Max           | 19.2               | 4.5                 | 55.8                 | 54.5              | 3.7               | 5.5            |
| SU-SO                        | Mean $\pm$ SD | 17.9 $\pm$ 1.39    | 0.4 $\pm$ 0.36      | 27.7 $\pm$ 5.45      | 51.9 $\pm$ 5.27   | 2.2 $\pm$ 1.31    | 3 $\pm$ 2.27   |
|                              | Median        | 17.6 <sup>ab</sup> | 0.4 <sup>a</sup>    | 23.4 <sup>a</sup>    | 52.7 <sup>e</sup> | 2.0 <sup>b</sup>  | 3.6            |
|                              | Min           | 16.0               | 0.1                 | 22.7                 | 41.6              | 0.2               | 0.1            |
|                              | Max           | 20.9               | 1.1                 | 37.6                 | 59.2              | 4.0               | 5.9            |
| SO                           | Mean $\pm$ SD | 18.1 $\pm$ 2.56    | 0.6 $\pm$ 0.73      | 26.7 $\pm$ 5.21      | 51.8 $\pm$ 0.12   | 2.8 $\pm$ 3.51    | 5 $\pm$ 0.00   |
|                              | Median        | 18.1 <sup>ab</sup> | 0.6 <sup>ab</sup>   | 26.7 <sup>a</sup>    | 51.8 <sup>e</sup> | 2.8 <sup>ab</sup> | 5.00           |
|                              | Min           | 16.3               | 0.0                 | 23.1                 | 51.7              | 0.4               | 5.00           |
|                              | Max           | 19.9               | 1.1                 | 30.4                 | 51.9              | 5.3               | 5.00           |
| <i>p</i> values <sup>1</sup> |               | <0.001             | 0.001               | <0.001               | <0.001            | 0.021             | 0.057          |

Abbreviations: SCP, blends of AO from seed oils, cocoa butter and palm oil; SP, blends of AO from seed and palm oils; O, AO from olive pomace oil and blends of AO from olive pomace and olive oils; BS, blends of AO from seed oils; SU, AO from sunflower oil; SU-SO, blends of AO from sunflower and soybean oils; SO, AO from soybean oil; SFA, saturated fatty acids; *cis*-MUFA, *cis*-mono-unsaturated fatty acids; *cis*-PUFA, *cis*-polyunsaturated fatty acids; UFA/SFA ratio, unsaturated/saturated ratio. <sup>1</sup> *p* values were obtained from Kruskal-Wallis U test. Stepwise Multiple Comparisons for independent samples were used to compare medians between botanical origin groups within acid oils (AO, *n* = 79). AO groups bearing different letters (a-d) were significantly different (*p*  $\leq$  0.05).

**Table S3.** Mean, standard deviation, median, minimum and maximum values for the different sums of fatty acids identified and quantified by peak area normalization (%) according to the botanical origin of the fatty acid distillates (FAD).

|                              |               | SFA (%)           | <i>trans</i> -C18:1 | <i>cis</i> -MUFA (%) | n-6 PUFA (%)      | n-3 PUFA (%)     | UFA/SFA ratio  |
|------------------------------|---------------|-------------------|---------------------|----------------------|-------------------|------------------|----------------|
| LFAD                         | Mean $\pm$ SD | 86.3 $\pm$ 1.4    | 0.2 $\pm$ 0.16      | 10.8 $\pm$ 1.57      | 2.6 $\pm$ 0.24    | 0.1 $\pm$ 0.02   | 3.9 $\pm$ 3.40 |
|                              | Median        | 87.1 <sup>c</sup> | 0.1                 | 9.9 <sup>a</sup>     | 2.5 <sup>a</sup>  | 0.1 <sup>a</sup> | 4.7            |
|                              | Min           | 84.3              | 0.1                 | 9.6                  | 2.3               | 0.0              | 0.2            |
|                              | Max           | 87.6              | 0.5                 | 13.2                 | 2.9               | 0.1              | 6.8            |
| PFAD                         | Mean $\pm$ SD | 53 $\pm$ 1.78     | 0.2 $\pm$ 0.07      | 37.6 $\pm$ 1.84      | 8.9 $\pm$ 0.31    | 0.3 $\pm$ 0.02   | 4.1 $\pm$ 0.55 |
|                              | Median        | 53.4 <sup>b</sup> | 0.2                 | 37 <sup>b</sup>      | 8.9 <sup>b</sup>  | 0.3 <sup>b</sup> | 4.2            |
|                              | Min           | 50.0              | 0.2                 | 35.9                 | 8.5               | 0.3              | 3.4            |
|                              | Max           | 55.1              | 0.3                 | 41.0                 | 9.3               | 0.4              | 4.6            |
| OFAD                         | Mean $\pm$ SD | 14.3 $\pm$ 2.14   | 0.2 $\pm$ 0.01      | 74.3 $\pm$ 3.44      | 10.2 $\pm$ 0.89   | 0.9 $\pm$ 0.39   | 2.6 $\pm$ 2.42 |
|                              | Median        | 14.3 <sup>a</sup> | 0.2                 | 74.3 <sup>c</sup>    | 10.2 <sup>c</sup> | 0.9 <sup>c</sup> | 2.6            |
|                              | Min           | 12.8              | 0.2                 | 71.9                 | 9.6               | 0.7              | 0.9            |
|                              | Max           | 15.8              | 0.2                 | 76.8                 | 10.9              | 1.2              | 4.3            |
| <i>p</i> values <sup>1</sup> |               | 0.006             | 0.493               | 0.006                | 0.006             | 0.006            | 0.607          |

Abbreviations: LFAD, FAD from coconut oil and blends of FAD from coconut and palm kernel oils; PFAD, FAD from palm oil; OFAD, FAD from olive pomace and olive oils; SFA, saturated fatty acids; *cis*-MUFA, *cis*-monounsaturated fatty acids; *cis*-PUFA, *cis*-polyunsaturated fatty acids. <sup>1</sup> *p* values were obtained from Kruskal-Wallis U test. Stepwise Multiple Comparisons for independent samples were used to compare medians between botanical origin groups within fatty acid distillates (FAD, *n* = 13). AO groups bearing different letters (a-c) were significantly different (*p*  $\leq$  0.05).
